# Supplementary material for: Identification of a Radiosensitivity Molecular Signature Induced by Enzalutamide in Hormone-sensitive and Hormone-resistant Prostate Cancer Cells
Source: PubMed Central journal article supplement (PMC6586860; doi:10.1038/s41598-019-44991-w), 2019-06-20
Supplement: 41598_2019_44991_MOESM1_ESM.pdf [file 41598_2019_44991_MOESM1_ESM.pdf]

## **Supplementary Information and Dataset legends**

**Title:** Identification of a Radiosensitivity Molecular Signature Induced by Enzalutamide in Hormone-sensitive and Hormone-resistant Prostate Cancer Cells

**Authors list:** Maryam Ghashghaei, Tamim M. Niazi, Adriana Aguilar-Mahecha, Kathleen Oros Klein, Celia M.T. Greenwood, Mark Basik, Thierry Muanza

## Supplementary Information

### Heatmap of differentially expressed genes from one-way ANOVA in LNCaP cell line

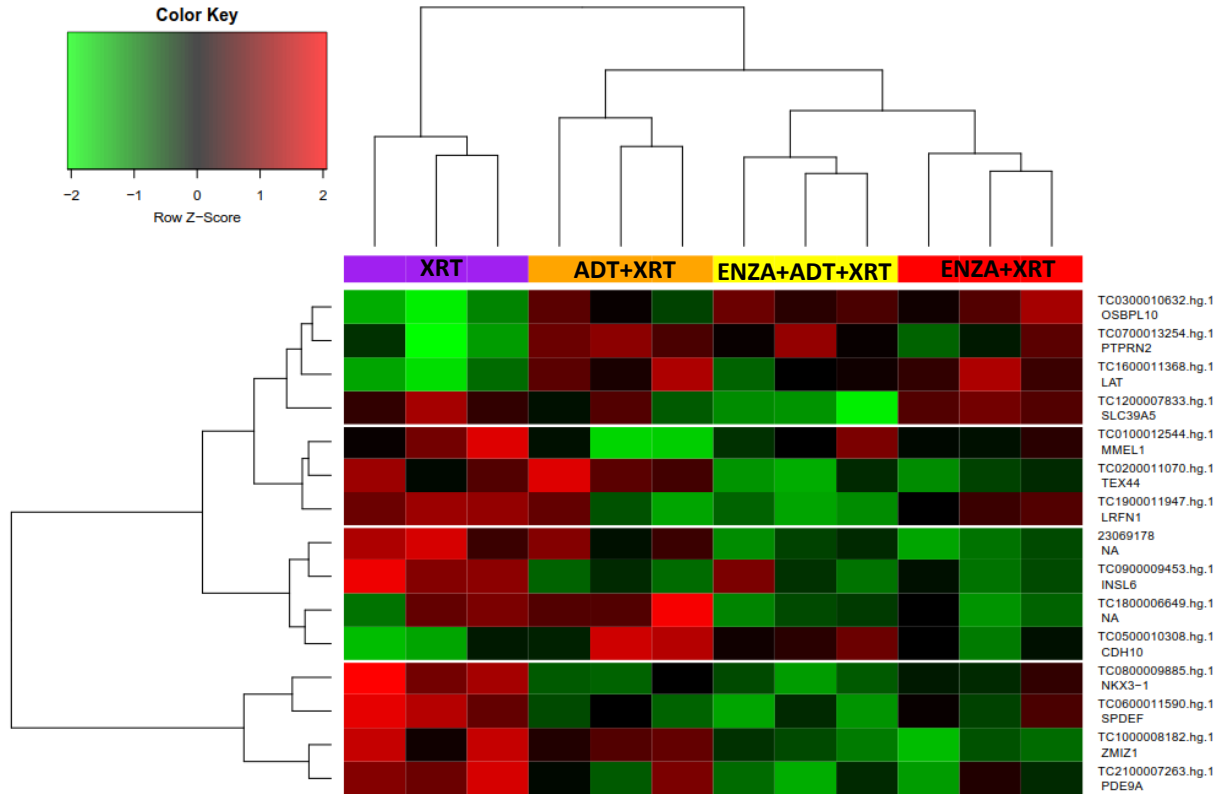

**Supplementary Figure 1. Heatmap of DE genes from one-way ANOVA in LNCaP cell line.** Purple, red, orange and yellow represent the four conditions, respectively: XRT, ENZA+XRT, ADT+XRT, and ENZA+ADT+XRT. XRT=Radiation, ENZA=Enzalutamide, ADT= Androgen deprivation therapy, DE= differentially expressed.

## Heatmap of differentially expressed genes from one-way ANOVA in C4-2 cell line

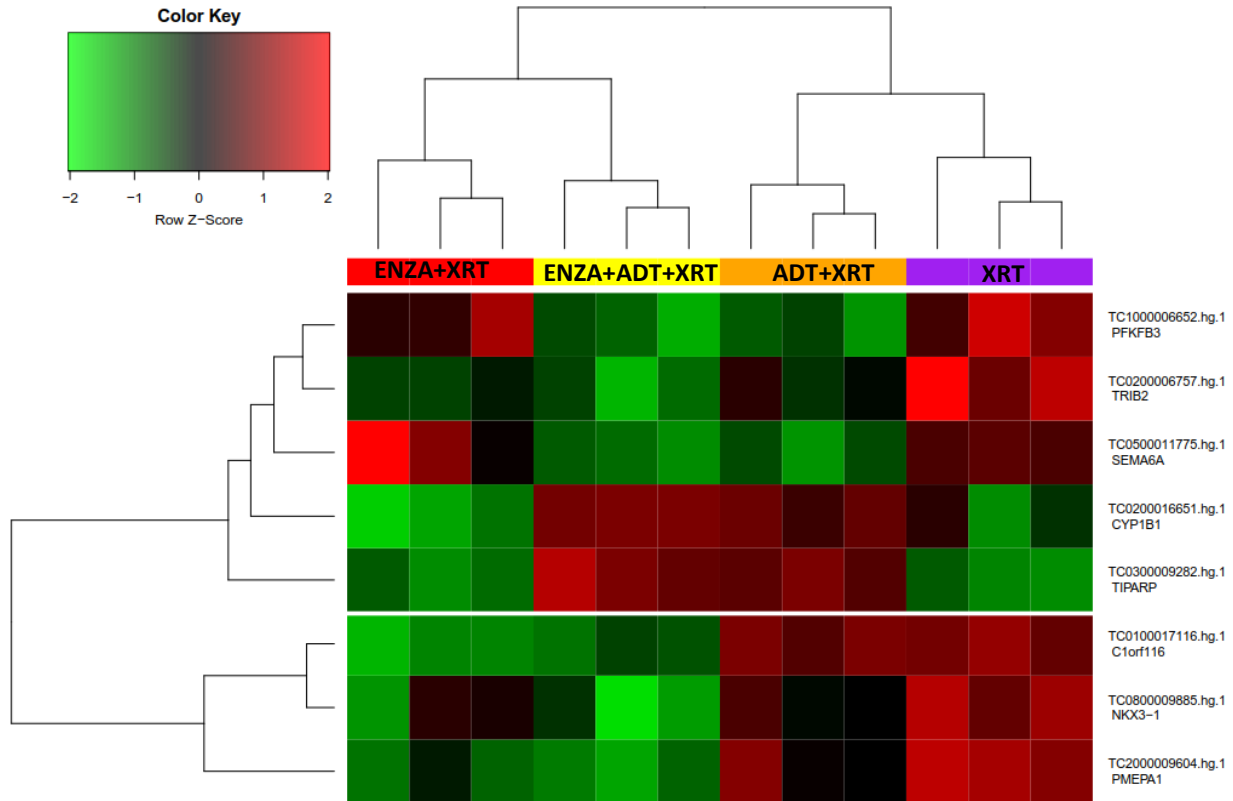

**Supplementary Figure 2. Heat map of DE genes from one-way ANOVA in C4-2 cell line.** Purple, red, orange and yellow represent the four conditions, respectively: XRT, ENZA+XRT, ADT+XRT, and ENZA+ADT+XRT. XRT=Radiation, ENZA=Enzalutamide, ADT= Androgen deprivation therapy, DE= differentially expressed.

**The most significant DE genes between ADT+XRT vs. XRT in LNCaP cell line**

| <b>Gene</b>              | <b>log FC</b> | <b>P-Value</b> | <b>Adj. P-Value</b> |
|--------------------------|---------------|----------------|---------------------|
| <i>PTPRN2</i>            | 1.143         | 3.433e-06      | 0.03458             |
| <i>CDH10</i>             | 1.172         | 3.947e-06      | 0.03458             |
| <i>MMEL1</i>             | -0.7629       | 4.743e-06      | 0.03458             |
| <i>INSL6</i>             | -0.83         | 5.398e-06      | 0.03458             |
| <i>NKX3-1</i>            | -1.085        | 7.445e-06      | 0.03458             |
| <i>LAT</i>               | 1.051         | 7.632e-06      | 0.03458             |
| <i>KBTBD2</i>            | 0.7891        | 2.587e-05      | 0.09145             |
| <i>CSDC2</i>             | -0.7017       | 2.691e-05      | 0.09145             |
| <i>TC0700013330.hg.1</i> | 0.7684        | 3.307e-05      | 0.09991             |
| <i>ZNF669</i>            | 0.5804        | 5.724e-05      | 0.1556              |
| <i>MOCS1</i>             | -0.5972       | 9.925e-05      | 0.2366              |

**Supplementary Table 1. The most significant DE genes between ADT+XRT vs. XRT in LNCaP cell line.** XRT=Radiation, ADT= Androgen deprivation therapy, DE= differentially expressed. P-values were corrected for multiple comparisons using FDR (B&H).

**The most significant DE genes between ADT+XRT vs. XRT in C4-2 cell line**

| <b>Gene</b>   | <b>Log FC</b> | <b>P-Value</b> | <b>Adj. P-Value</b> |
|---------------|---------------|----------------|---------------------|
| <i>CYP1A1</i> | 2.417         | 7.505e-07      | 0.02041             |
| <i>CYP1A2</i> | 3.093         | 3.241e-06      | 0.04406             |
| <i>FBXL5</i>  | 0.6239        | 9.19e-06       | 0.08329             |
| <i>CC2D2A</i> | 0.7147        | 8.507e-05      | 0.4707              |

**Supplementary Table 2. The most significant DE genes between ADT+XRT vs. XRT in C4-2 cell line.** XRT=Radiation, ADT= Androgen deprivation therapy, DE= differentially expressed. P-values were corrected for multiple comparisons using FDR (B&H).

**The most significant DE genes between XRT+ ENZA+ADT vs. XRT in LNCaP cell line**

| <b>Gene</b>     | <b>Log FC</b> | <b>P-Value</b> | <b>Adj. P-Value</b> |
|-----------------|---------------|----------------|---------------------|
| <i>NKX3-1</i>   | -1.277        | 4.275e-07      | 0.01162             |
| <i>SPDEF</i>    | -0.5095       | 4.289e-06      | 0.04264             |
| <i>LRFN1</i>    | -0.8624       | 4.705e-06      | 0.04264             |
| <i>PDE9A</i>    | -0.9291       | 9.066e-06      | 0.06162             |
| <i>SLC39A5</i>  | -0.9146       | 1.509e-05      | 0.08203             |
| <i>NAPEPLD</i>  | 0.6952        | 1.935e-05      | 0.08561             |
| <i>SLC25A37</i> | -0.7242       | 2.204e-05      | 0.08561             |
| <i>TANK</i>     | 0.5541        | 2.771e-05      | 0.09416             |
| <i>ZBTB16</i>   | -1.5          | 5.048e-05      | 0.1422              |
| <i>OSBPL10</i>  | 1.023         | 5.229e-05      | 0.1422              |
| <i>FAM57A</i>   | -0.7497       | 5.967e-05      | 0.1475              |
| <i>23072083</i> | 0.9159        | 7.366e-05      | 0.1608              |
| <i>DUSP19</i>   | 1.021         | 7.689e-05      | 0.1608              |
| <i>LBH</i>      | -0.6985       | 8.414e-05      | 0.1619              |
| <i>PTPRN2</i>   | 0.9196        | 9.003e-05      | 0.1619              |
| <i>SLC16A6</i>  | -0.7354       | 9.786e-05      | 0.1619              |

**Supplementary Table 3. The most significant DE genes between XRT+ ENZA+ADT vs. XRT in LNCaP cell line.** XRT=Radiation, ENZA=Enzalutamide, ADT= Androgen deprivation therapy, DE= differentially expressed. P-values were corrected for multiple comparisons using FDR (B&H).

**The most significant DE genes between XRT+ ENZA+ADT vs. XRT in C4-2 cell line**

| <b>Gene</b>                 | <b>Log FC</b> | <b>P-Value</b> | <b>Adj. P-Value</b> |
|-----------------------------|---------------|----------------|---------------------|
| <i>TRIB2</i>                | -1.336        | 8.25e-08       | 0.002243            |
| <i>CYP1A1</i>               | 2.498         | 4.065e-07      | 0.005527            |
| <i>NKX3-1</i>               | -1.145        | 3.036e-06      | 0.02752             |
| <i>CYP1A2</i>               | 2.894         | 9.636e-06      | 0.0655              |
| <i>PMEPA1</i>               | -1.259        | 1.804e-05      | 0.09812             |
| <i>HTA2-neg-47421856_st</i> | 2.352         | 2.535e-05      | 0.1149              |
| <i>TGIF1</i>                | 0.5261        | 4.256e-05      | 0.1653              |
| <i>FBXL5</i>                | 0.5458        | 6.558e-05      | 0.2229              |

**Supplementary Table 4. The most significant DE genes between XRT+ ENZA+ADT vs. XRT in C4-2 cell line.** XRT=Radiation, ENZA=Enzalutamide, ADT= Androgen deprivation therapy, DE= differentially expressed. P-values were corrected for multiple comparisons using FDR (B&H).

**The most significant DE genes between ENZA vs. CTR in LNCaP cell line**

| <b>Gene</b>                | <b>Log FC</b> | <b>P-Value</b> | <b>Adj. P-Value</b> |
|----------------------------|---------------|----------------|---------------------|
| <i>HTA2-pos-2978683_st</i> | -1.789        | 6.89e-09       | 0.0001873           |
| <i>FANCD2OS</i>            | -0.7816       | 4.601e-05      | 0.3744              |
| <i>LRP4</i>                | -0.5396       | 8.313e-05      | 0.3744              |
| <i>ZBTB16</i>              | -1.435        | 9.258e-05      | 0.3744              |
| <i>SYT8</i>                | 0.8242        | 9.51e-05       | 0.3744              |

**Supplementary Table 5. The most significant DE genes between ENZA vs. CTR in LNCaP cell line.** CTR=Control, ENZA=Enzalutamide, DE= differentially expressed. P-values were corrected for multiple comparisons using FDR (B&H).



**The most significant DE genes between ENZA vs. CTR in C4-2 cell line**

| <b>Gene</b>         | <b>Log FC</b> | <b>P-Value</b> | <b>Adj. P-Value</b> |
|---------------------|---------------|----------------|---------------------|
| <b><i>VSTM4</i></b> | 0.8132        | 7.962e-05      | 0.9998              |

**Supplementary Table 6. The most significant DE genes between ENZA vs. CTR in C4-2 cell line.** CTR=Control, ENZA=Enzalutamide, DE= differentially expressed. P-values were corrected for multiple comparisons using FDR (B&H).

**The most significant DE genes between ADT vs. CTR in LNCaP cell line**

| <b>Gene</b>                 | <b>Log FC</b> | <b>P-Value</b> | <b>Adj. P-Value</b> |
|-----------------------------|---------------|----------------|---------------------|
| <i>HTA2-pos-2978683_st</i>  | -1.74         | 1.276e-08      | 0.000347            |
| <i>HTA2-neg-47419193_st</i> | -0.9197       | 1.146e-06      | 0.01558             |
| <i>CYP1A1</i>               | 2.191         | 4.193e-06      | 0.038               |
| <i>OLFM4</i>                | 0.9543        | 2.188e-05      | 0.1487              |
| <i>TC0600014205.hg.1</i>    | 1.029         | 4.253e-05      | 0.2313              |
| <i>HTA2-pos-47421979_st</i> | 1.386         | 5.965e-05      | 0.242               |
| <i>ALPP</i>                 | 0.7721        | 7.238e-05      | 0.242               |
| <i>ZNF391</i>               | 0.726         | 7.951e-05      | 0.242               |
| <i>TRAF5</i>                | -0.9546       | 8.295e-05      | 0.242               |
| <i>KCTD8</i>                | 0.7943        | 8.901e-05      | 0.242               |

**Supplementary Table 7. The most significant DE genes between ADT vs. CTR in LNCaP cell line.** CTR=Control, ADT= Androgen deprivation therapy, DE= differentially expressed. P-values were corrected for multiple comparisons using FDR (B&H).

**The most significant DE genes between ADT vs. CTR in C4-2 cell line**

| <b>SYMBOL</b>                      | <b>Log FC</b> | <b>P-Value</b> | <b>Adj. P-Value</b> |
|------------------------------------|---------------|----------------|---------------------|
| <i><b>FBXL5</b></i>                | 0.8815        | 1.356e-08      | 0.0003686           |
| <i><b>CYP1A1</b></i>               | 2.501         | 3.978e-07      | 0.005408            |
| <i><b>CYP1A2</b></i>               | 3.208         | 1.726e-06      | 0.01564             |
| <i><b>HTA2-neg-47422186_st</b></i> | 0.8041        | 2.205e-05      | 0.1499              |
| <i><b>ADAMTS3</b></i>              | -0.7052       | 5.788e-05      | 0.3147              |
| <i><b>SLC5A1</b></i>               | 0.8682        | 7.697e-05      | 0.3488              |
| <i><b>CCNG2</b></i>                | 0.6596        | 9.242e-05      | 0.359               |

**Supplementary Table 8. The most significant DE genes between ADT vs. CTR in C4-2 cell line.** CTR=Control, ADT= Androgen deprivation therapy, DE= differentially expressed. P-values were corrected for multiple comparisons using FDR (B&H).

**The most significant DE genes between ENZA+ ADT vs. CTR in LNCaP cell line**

| <b>SYMBOL</b>               | <b>Log FC</b> | <b>P-Value</b> | <b>Adj. P-Value</b> |
|-----------------------------|---------------|----------------|---------------------|
| <i>HTA2-pos-2978683_st</i>  | -1.725        | 1.542e-08      | 0.0004193           |
| <i>HTA2-neg-47419193_st</i> | -0.8388       | 5.567e-06      | 0.07568             |
| <i>CYP1A1</i>               | 2.089         | 9.123e-06      | 0.08268             |
| <i>SYT8</i>                 | 0.8408        | 7.301e-05      | 0.4123              |
| <i>POP1</i>                 | -0.6949       | 7.864e-05      | 0.4123              |
| <i>TC0900010900.hg.1</i>    | -1.004        | 9.325e-05      | 0.4123              |

**Supplementary Table 9. The most significant DE genes between ENZA+ ADT vs. CTR in LNCaP cell line.** CTR=Control, ENZA=Enzalutamide, ADT= Androgen deprivation therapy, DE= differentially expressed. P-values were corrected for multiple comparisons using FDR (B&H).

**The most significant DE genes between ENZA+ADT vs. CTR in C4-2 cell line**

| <b>SYMBOL</b>        | <b>Log FC</b> | <b>P-Value</b> | <b>Adj. P-Value</b> |
|----------------------|---------------|----------------|---------------------|
| <b><i>FBXL5</i></b>  | 0.7326        | 5.774e-07      | 0.0157              |
| <b><i>CYP1A1</i></b> | 2.357         | 1.191e-06      | 0.01618             |
| <b><i>CYP1A2</i></b> | 3.128         | 2.682e-06      | 0.02431             |

**Supplementary Table 10. The most significant DE genes between ENZA+ADT vs. CTR in C4-2 cell line.** CTR=Control, ENZA=Enzalutamide, ADT= Androgen deprivation therapy, DE= differentially expressed. P-values were corrected for multiple comparisons using FDR (B&H).

Venn diagrams of up-regulated and down-regulated genes in LNCaP and C4-2 cells

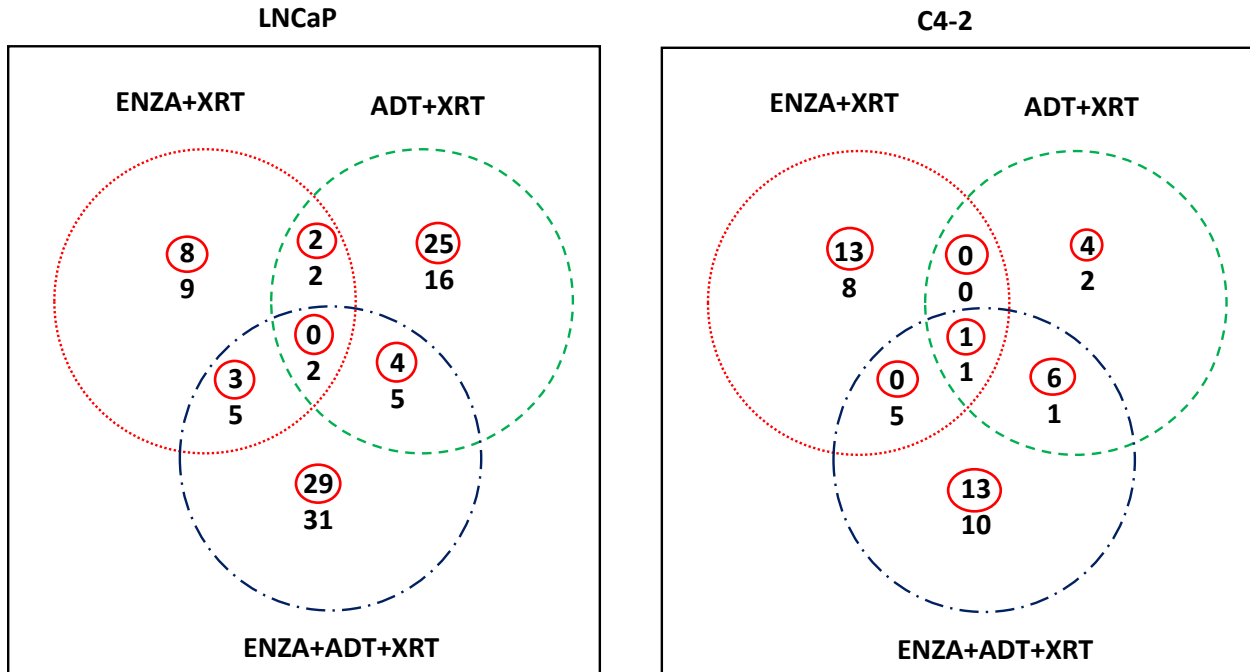

**Supplementary Figure 3. Venn diagrams of up-regulated and down-regulated genes in LNCaP and C4-2 cells.** The diagram shows deregulated genes (cutoff p-value < 0.01) after treatment with ENZA+XRT, ADT+XRT and ENZA+ADT+XRT in LNCaP and C4-2 cell lines. The numbers in the oval represent the number of up-regulated genes in each treatment condition and the numbers below the oval represent down-regulated genes. XRT= Radiation, ENZA= Enzalutamide, ADT= Androgen deprivation therapy. P-values were corrected for multiple comparisons using FDR.

## Validation by RT-qPCR of the microarray data

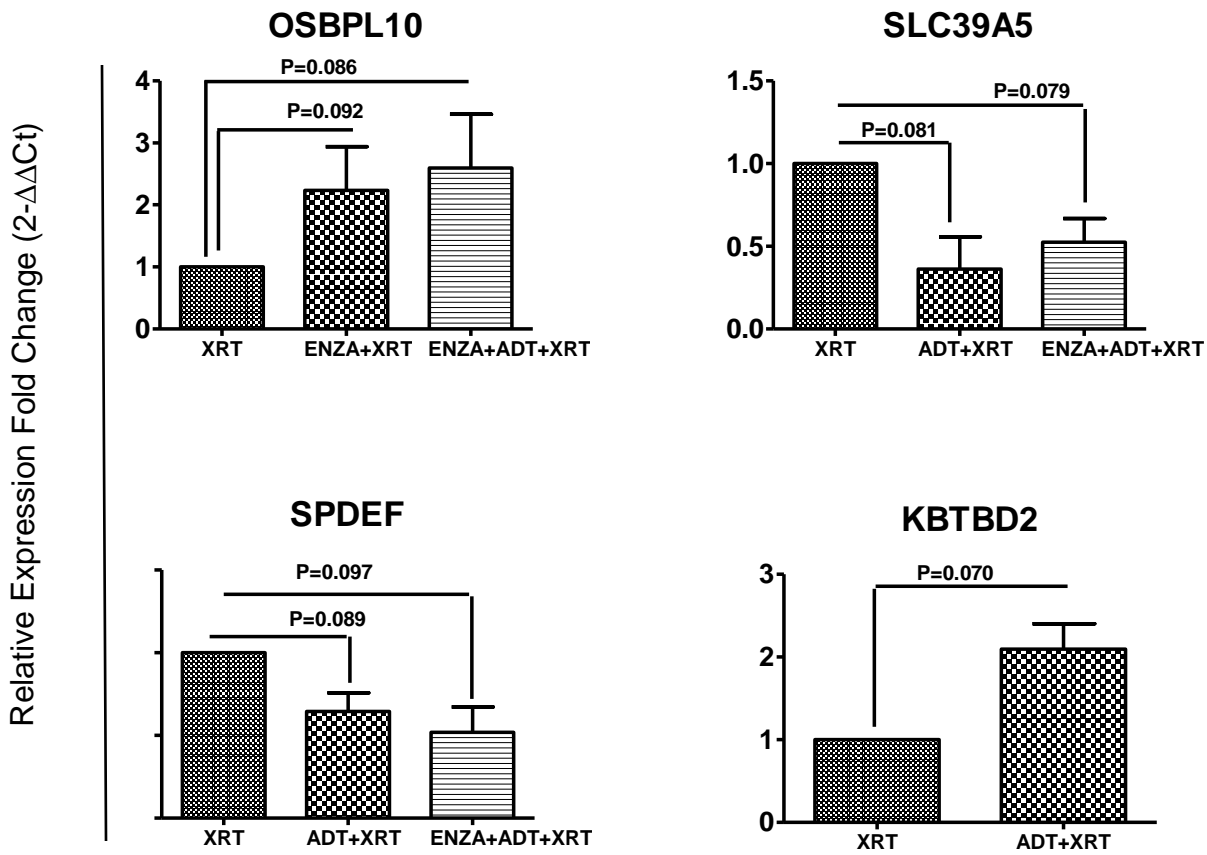

**Supplementary Figure 4. Validation by RT-qPCR of the microarray data.** A set of up-regulated and down-regulated genes in LNCaP cells was analyzed by RT-qPCR to validate the microarray data. All the RT-qPCR results were normalized to the expression level of GAPDH in each sample. Results are presented as the mean  $\pm$  SE. The level of significance in the statistical analysis is indicated as (\*) p-value  $<0.05$ , (\*\*) p-value  $<0.01$ , (\*\*\*) p-value  $<0.001$  using two-tailed test.

**List of hazards ratio and p-value for 10 significant candidate genes**

| <b>Gene</b>    | <b>P-value</b> | <b>HR</b> | <b>95% CI</b> | <b>HR (Radiation)</b> | <b>HR (No Radiation)</b> |
|----------------|----------------|-----------|---------------|-----------------------|--------------------------|
| <i>SLC16A6</i> | 0.000318       | 1.495     | 1.226-1.823   | 1.139                 | 1.682                    |
| <i>POPI</i>    | 0.003125       | 1.447     | 1.166-1.795   | 1.067                 | 1.707                    |
| <i>LAT</i>     | 0.00401        | 1.335     | 1.122-1.588   | 1.275                 | 1.364                    |
| <i>KBTBD2</i>  | 0.005673       | 1.508     | 1.121-2.029   | 1.085                 | 1.712                    |
| <i>OSBPL10</i> | 0.009153       | 1.456     | 1.099-1.929   | 1.76                  | 1.473                    |
| <i>SLC39A5</i> | 0.01157        | 1.362     | 1.098-1.69    | 1.876                 | 1.364                    |
| <i>TRAF5</i>   | 0.0192         | 1.383     | 1.067-1.791   | 1.008                 | 1.614                    |
| <i>PTPRN2</i>  | 0.03551        | 0.757     | 0.593-0.9663  | 0.7521                | 0.7049                   |
| <i>LBH</i>     | 0.04417        | 1.313     | 1.016-1.695   | 0.8646                | 1.416                    |
| <i>TANK</i>    | 0.04896        | 1.325     | 0.9915-1.772  | 1.151                 | 1.429                    |

**Supplementary Table 11. List of hazards ratio and p-value for 10 significant candidate genes, where significance was defined at  $p < 0.05$  without any correction for multiple testing. CI= Confidence interval. HR=Hazard ratio.**



## The density plot of 10 candidate genes using TCGA PRAD dataset

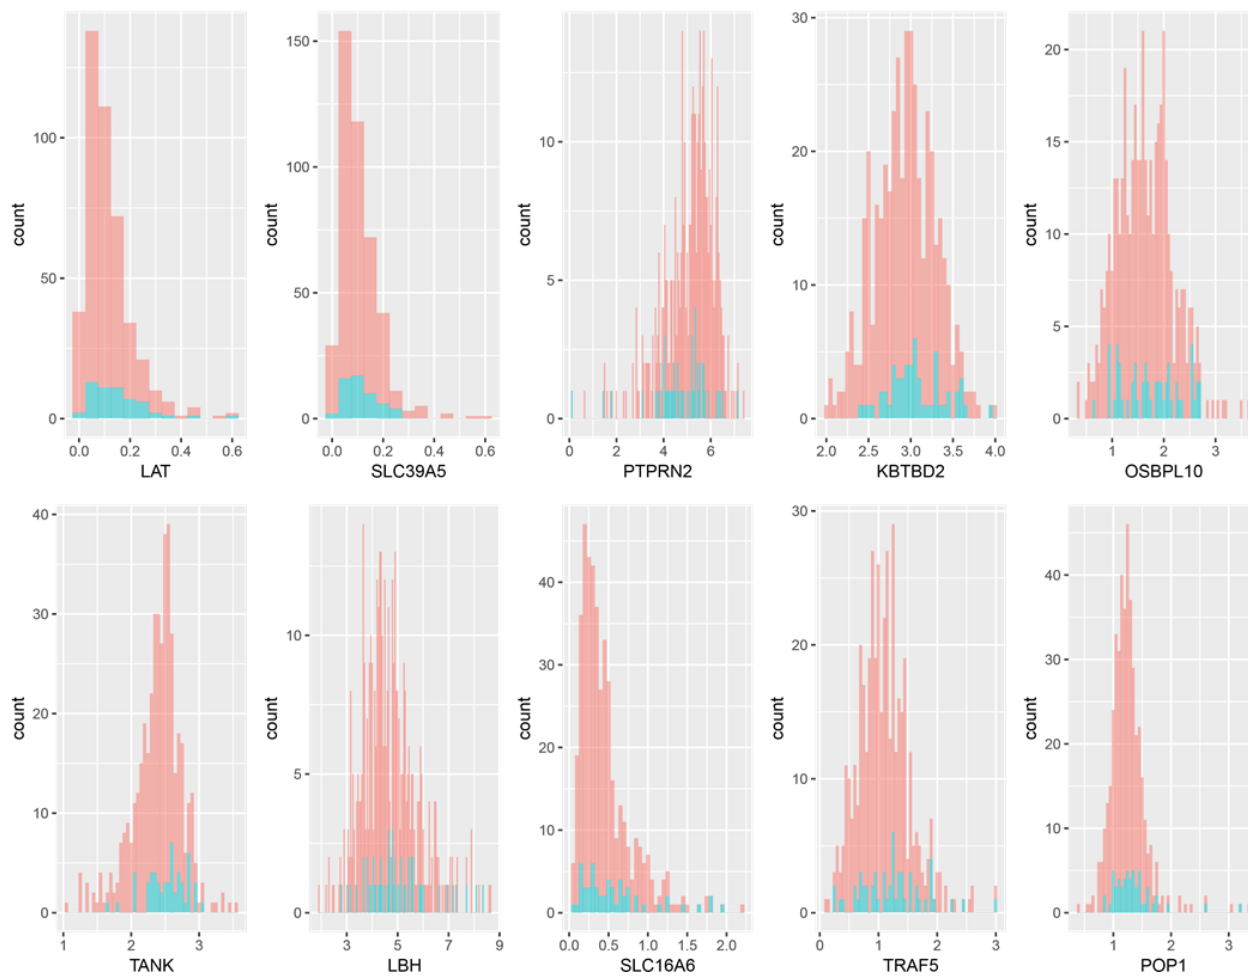

**Supplementary Figure 5. The density plot of 10 candidate genes using TCGA PRAD dataset.**

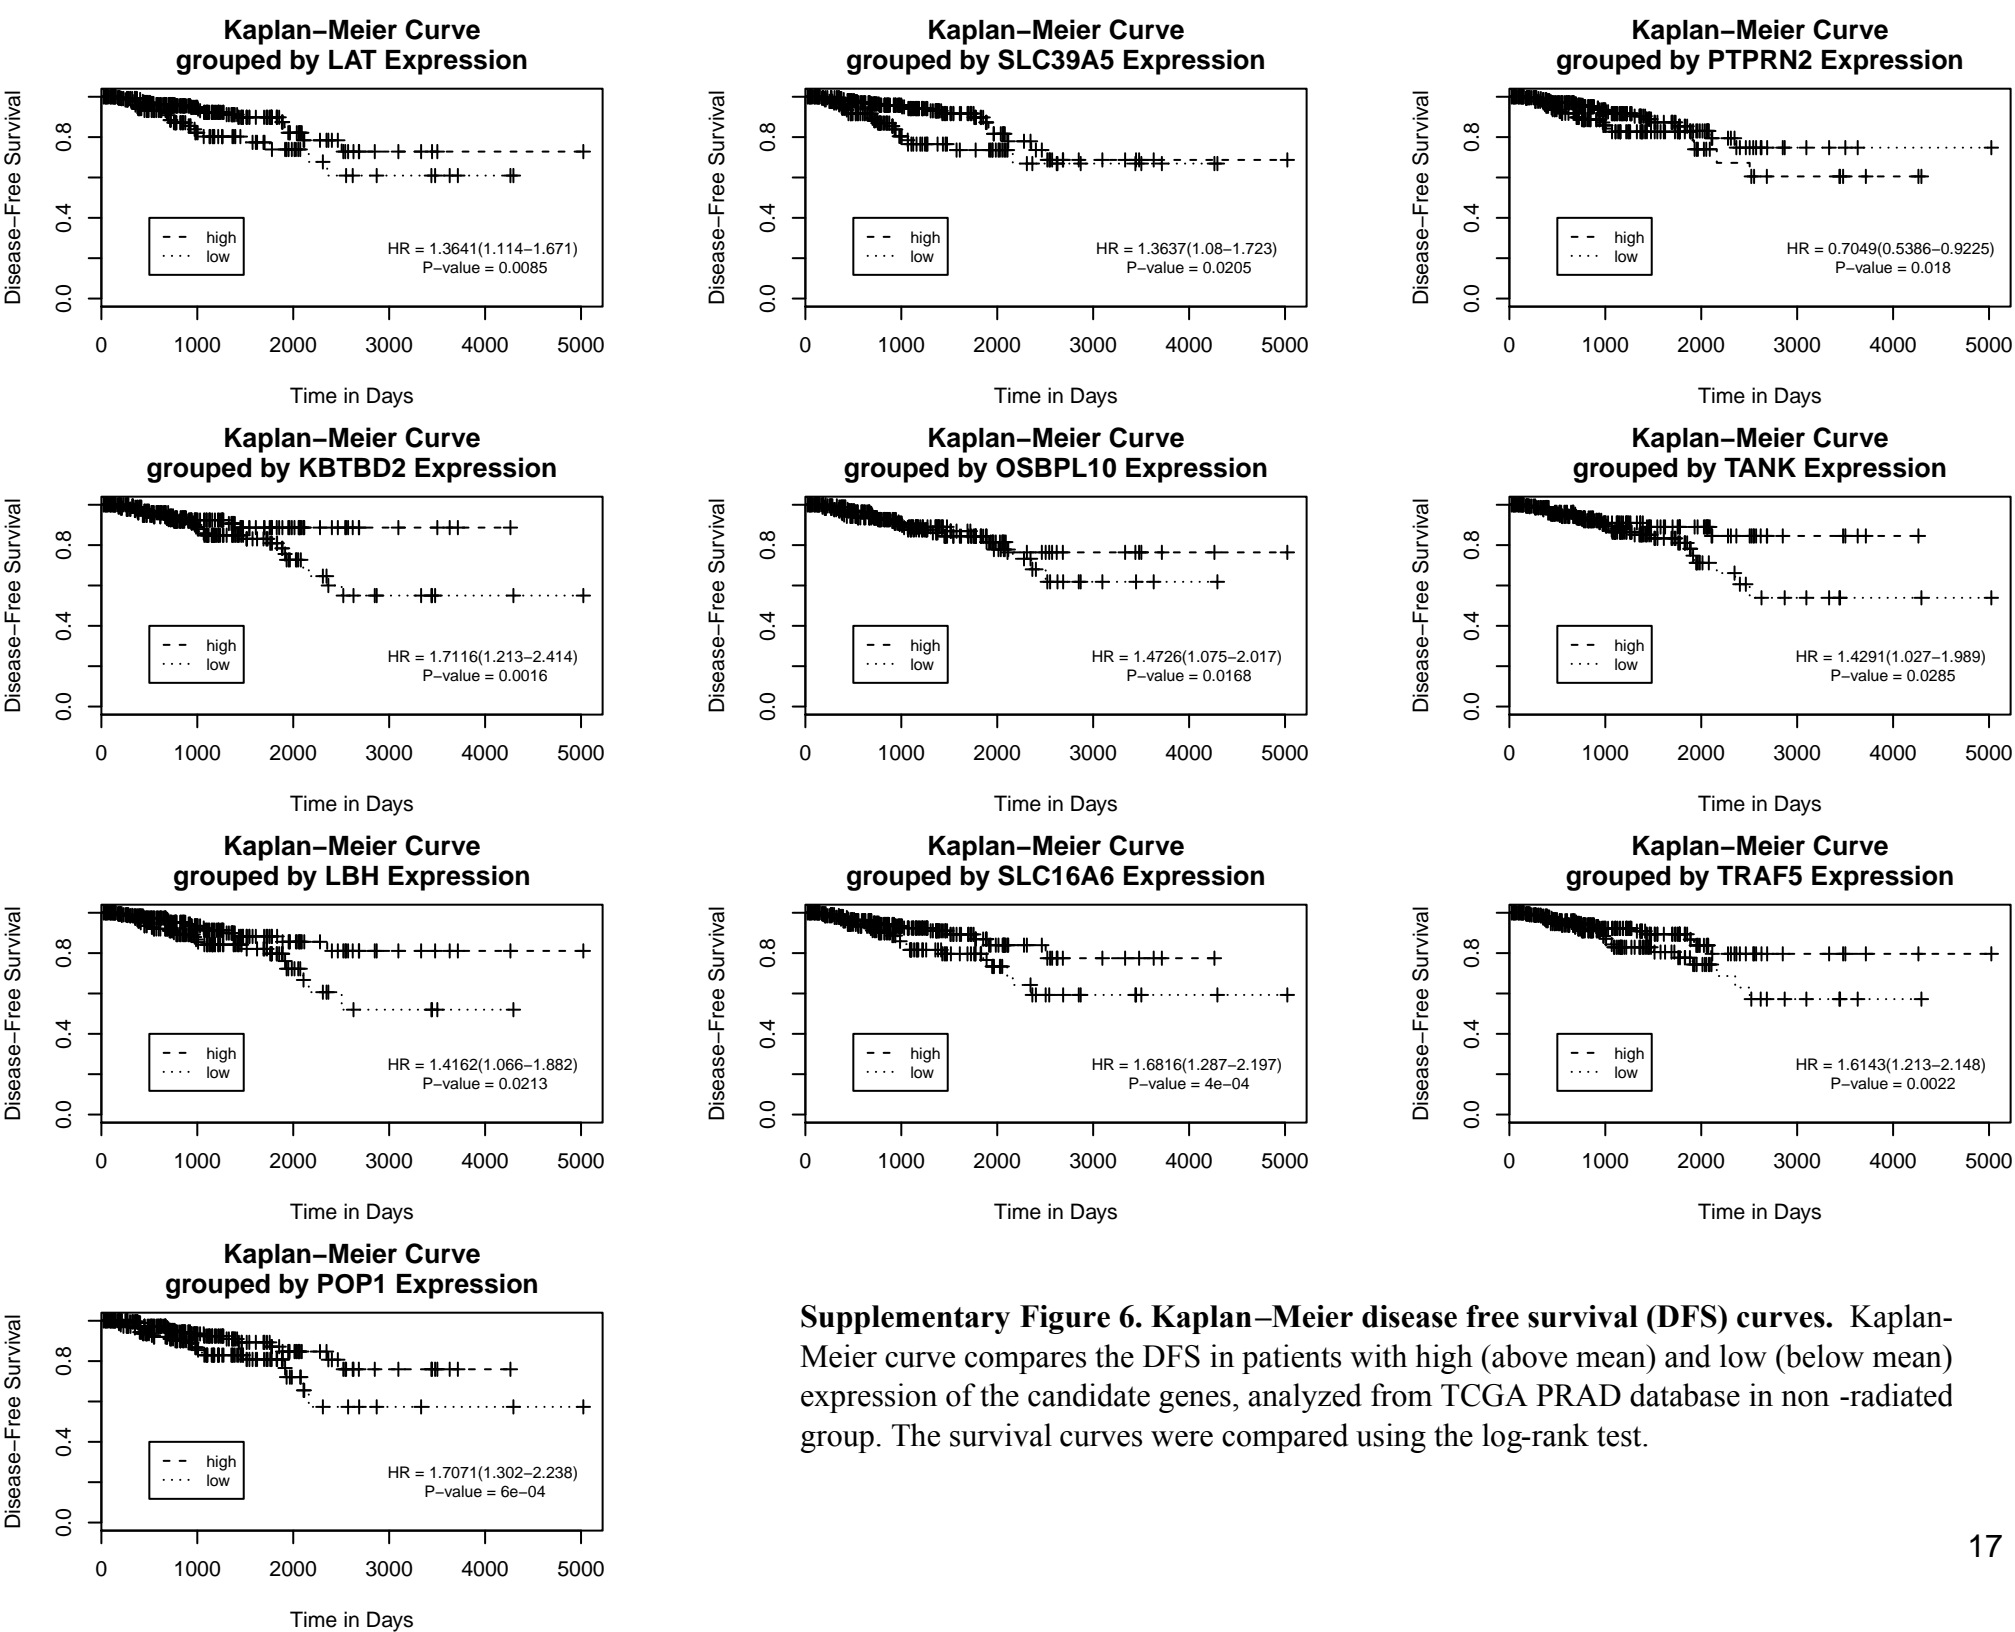

**Supplementary Figure 6. Kaplan–Meier disease free survival (DFS) curves.** Kaplan–Meier curve compares the DFS in patients with high (above mean) and low (below mean) expression of the candidate genes, analyzed from TCGA PRAD database in non -radiated group. The survival curves were compared using the log-rank test.

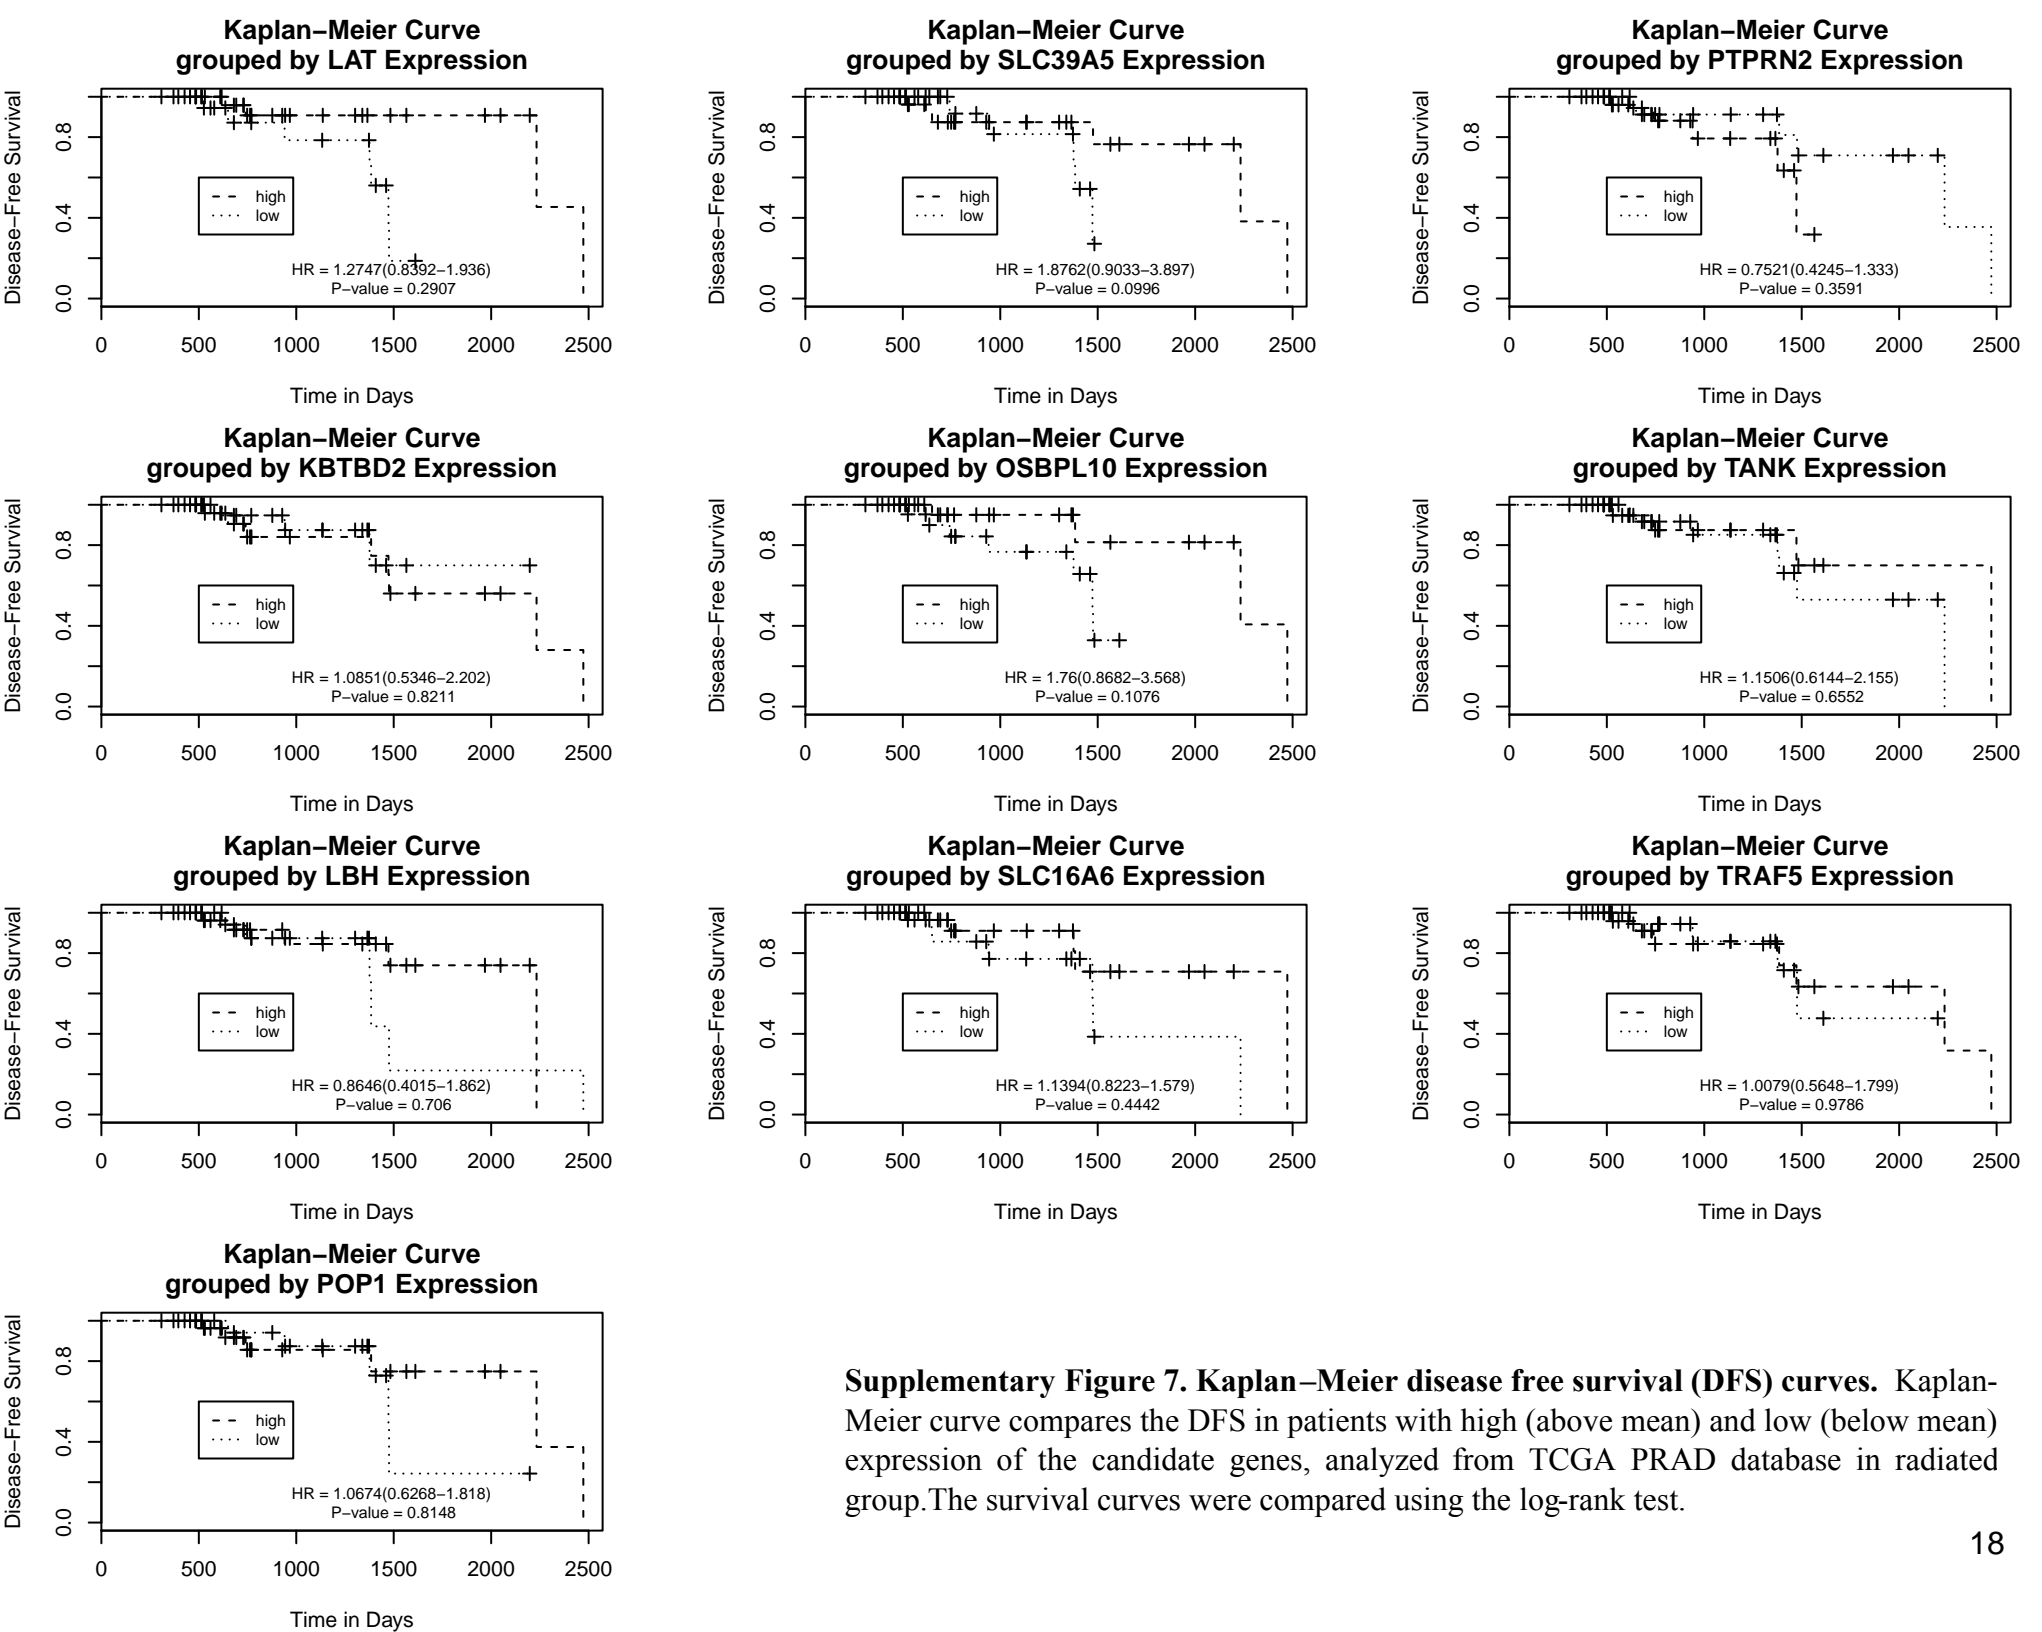

**Supplementary Figure 7. Kaplan–Meier disease free survival (DFS) curves.** Kaplan–Meier curve compares the DFS in patients with high (above mean) and low (below mean) expression of the candidate genes, analyzed from TCGA PRAD database in radiated group. The survival curves were compared using the log-rank test.

**DFS rates of 5 -year for all the candidate genes**

|                | <b>5-year DFS</b>          |                             |
|----------------|----------------------------|-----------------------------|
|                | <b>Low gene expression</b> | <b>High gene expression</b> |
| <b>LAT</b>     | 64%                        | 85%                         |
| <b>SLC39A5</b> | 67%                        | 85%                         |
| <b>PTPRN2</b>  | 72%                        | 80%                         |
| <b>KBTBD2</b>  | 72%                        | 85%                         |
| <b>TANK</b>    | 84%                        | 88%                         |
| <b>OSBPL10</b> | 72%                        | 82%                         |
| <b>LBH</b>     | 72%                        | 82%                         |
| <b>SLC16A6</b> | 70%                        | 82%                         |
| <b>TRAF5</b>   | 70%                        | 82%                         |
| <b>POP1</b>    | 70%                        | 85%                         |

**Supplementary Table 12. DFS rates of 5 -year for all the candidate genes. DFS= Disease free survival. Yrs=Year.**

**Box plot of FPKM values for selected candidate genes from TCGA-PRAD and GSE25136 datasets**

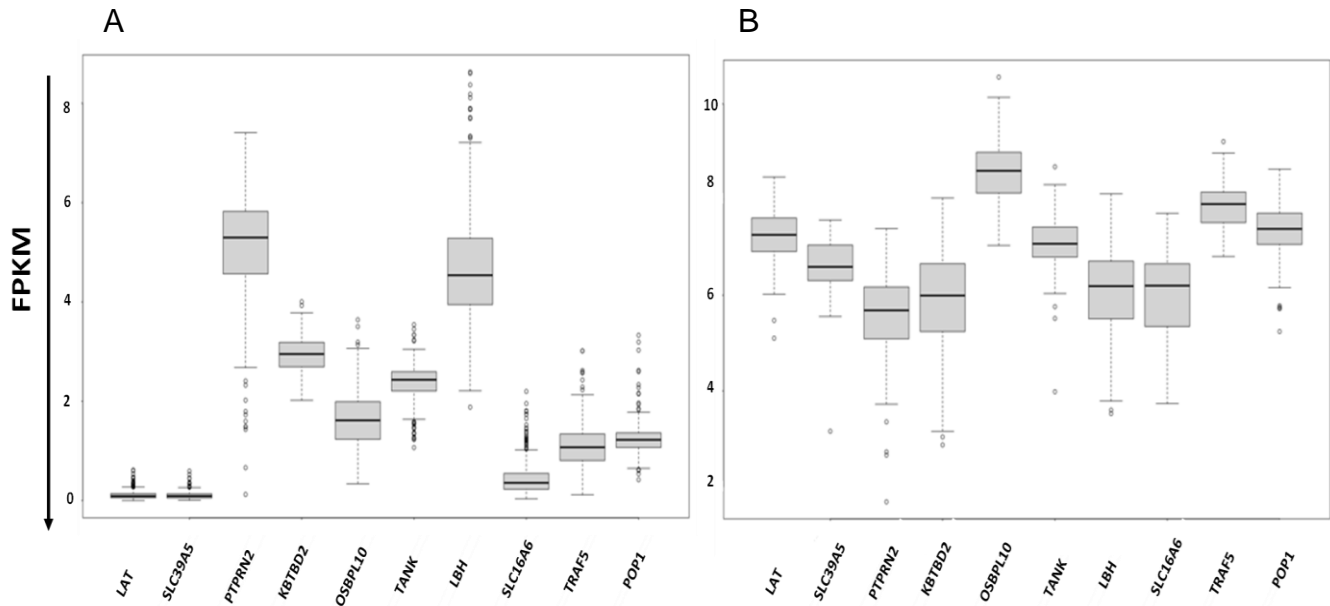

**Supplementary Figure 8. Box plot of log2-transformed FPKM values for selected candidate genes from TCGA-PRAD (A) and GSE25136 (B) dataset.** Box plots represent the differences in transcript levels of each candidate gene in two datasets. The median value is represented by the middle line in the boxes.

### Primer sequences used in the qRT-PCR analysis

| Gene      | Sequence               | TM   | Gene     | Sequence              | TM    |
|-----------|------------------------|------|----------|-----------------------|-------|
| LAT-F     | GAGCTACGAGAACGAGGGTG   | 64.5 | PDE9A-F  | GGCCATCTACCTGGACATCG  | 64.5  |
| LAT-R     | CTGTTCTGGGGTAACGAC     | 64.5 | PDH9A-R  | TTGATGGCCACAGGTCTCAC  | 62.4  |
| OSBPL10-F | CATCGACACAACCACACTGC   | 62.4 | CDH10-F  | GTGTGCTTGACAGCCAAG    | 62.4  |
| OSBPL10-R | AAGTATACCCAGCCATCGCC   | 62.4 | CDH10-R  | GAGGAGGATGGCGATCAAGG  | 64.5  |
| PTPRN2-F  | GCCTGTGTGAACGATG GAGT  | 62.4 | ACTB-F   | AGAGAGGCATCCTCACCTG   | 60.69 |
| PTPRN2-R  | TTCGGGAGGTCTGCAAGTTC   | 62.4 | ACTB-R   | GATAGCACAGCCTGGATAGCA | 59.65 |
| SLC39A5-F | GGAAGAGTCAAAGGCCCTC    | 64.5 | TRAF5-F  | AACCTGACCCCAATAGCAGC  | 62.4  |
| SLC39A5-R | CTGGGAGCCGTTCAGACAAT   | 62.4 | TRAF5-R  | TCAGTTAAGTCCACGGCCAC  | 62.4  |
| NKX3-1-F  | CAGAGACCGAGCCAGAAAGG   | 64.5 | GAPDH-F  | GAGAAGGCTGGGCTCATTT   | 62.4  |
| NKX3-1-R  | CTGAGTGTGGGAGAAGGCAG   | 64.5 | GAPDH-R  | AGTGATGGCATGGACTGTGG  | 62.4  |
| SPDEF-F   | AAAGAGCGGACTTCACCTGG   | 62.4 | KBTBD2-F | AGCCCCAAGCAGAAAAAGT   | 60.4  |
| SPDEF-R   | CTGTGGGGCTTGAGTAGCAA   | 62.4 | KBTBD2-R | TGCGGACAAAAAGCATTGGG  | 60.4  |
| ZMIZ1-F   | GGTCCCACCCAGGCGTAT     | 64.5 | CYP1A1-F | CACGGAGTTTCTTCTG GCCT | 62.4  |
| ZMIZ1-R   | GAATAGGAAGG GACTGGGG C | 64.5 | CYP1A1-R | CAATTCGGATCTG CAGCACG | 62.4  |
| TANK-F    | GAGGTGCACCATCCATCACA   | 62.4 | CYP1A2-F | TGTCAGTGCCAACGTCATT   | 60.4  |
| TANK-R    | ACTAAGGATGCCGGTCTCT    | 62.4 | CYP1A2-R | GAAGAAGTCCAGGGGTTCC   | 64.5  |

**Supplementary Table 13. Primer sequences used in the qRT-PCR analysis.**

TM= Melting temperature, F=Forward, R=Reverse.

## Quantile-quantile plots

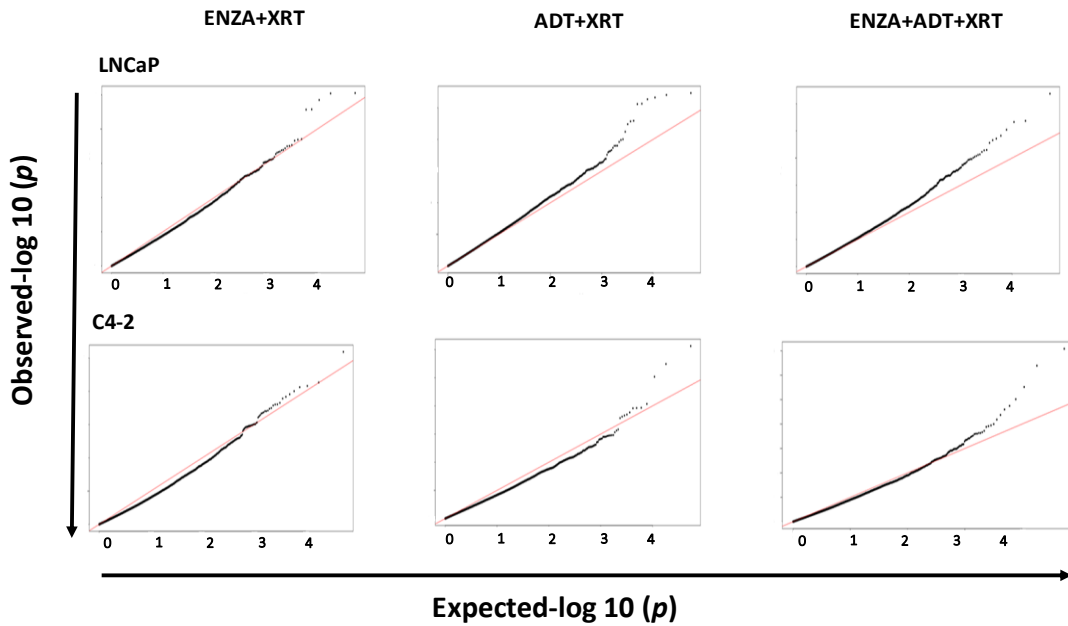

**Supplementary Figure 9. Quantile-quantile plot of observed-log 10 (p) values vs. expected-log 10 (p) values in LNCaP and C4-2 cells in radiated groups (ENZA+XRT, ADT+XRT, ENZA+ADT+XRT). Diagonal line (expected p-values) indicates a p-value distribution. Upward deviations indicate p-values more significant than expected. XRT=Radiation, ENZA=Enzalutamide, ADT= Androgen deprivation therapy.**

## Quantile-quantile plots

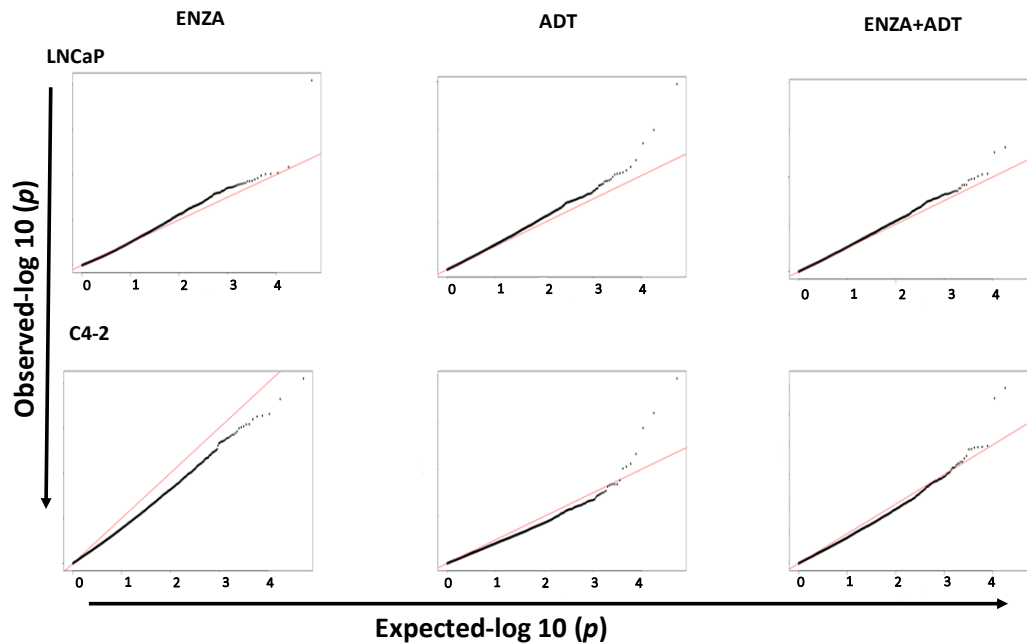

**Supplementary Figure 10. Quantile-quantile plot of observed-log 10 (p) values vs. expected-log 10 (p) values in LNCaP and C4-2 cells in non-radiated groups (ENZA, ADT, ENZA+ADT).** Diagonal line (expected p-values) indicates a p-value distribution. Upward deviations indicate p-values more significant than expected. CTR=Control, ENZA=Enzalutamide, ADT= Androgen deprivation therapy.



**Pathological and clinical data for prostate cancer**

|                               | <b>Patients (n=438)</b> |
|-------------------------------|-------------------------|
| <b>Age (Year)</b>             | 60 (41-80)              |
| <b>GS</b>                     |                         |
| ≤6                            | 35 (7.98%)              |
| =7                            | 229 (52.24%)            |
| ≥8                            | 170 (38.81%)            |
| <b>Pathological T</b>         |                         |
| T4                            | 10 (2.27%)              |
| T3a                           | 145 (33.0%)             |
| T3b                           | 115 (26.3%)             |
| T2a                           | 10 (2.27%)              |
| T2b                           | 9 (1.95%)               |
| T2c                           | 150 (34.3%)             |
| <b>Pathological N</b>         |                         |
| N0                            | 360 (82.2%)             |
| N1                            | 78 (17.8%)              |
| <b>Biochemical Recurrence</b> |                         |
| Yes                           | 56 (12.8%)              |
| No                            | 382 (87.2%)             |
| <b>Clinical-M</b>             |                         |
| M0                            | 436 (99.5%)             |
| M1a                           | 1 (0.175%)              |
| M1b                           | 1 (0.175%)              |
| M1c                           | 1 (0.175%)              |
| <b>Clinical-T</b>             |                         |
| T4                            | 2 (0.398%)              |
| T3a                           | 42 (9.54%)              |
| T3b                           | 17 (3.78%)              |
| T2a                           | 63 (14.3%)              |
| T2b                           | 63 (14.3%)              |
| T2c                           | 54 (12.3%)              |
| T1a                           | 1 (0.199%)              |
| T1b                           | 2 (0.398%)              |
| T1c                           | 185 (42.1%)             |
| <b>Radiation Therapy</b>      |                         |
| Yes                           | 55 (12.6%)              |
| No                            | 383 (87.4%)             |

**Supplementary Table 14. Pathological and clinical data for prostate cancer**

## Supplementary Datasets

**Supplementary Dataset S1. Differential expression results for different treatment conditions (ENZA+XRT vs. XRT, ADT+XRT vs. XRT, ENZA+ADT+XRT vs. XRT) in LNCaP cell line.** Genes are ordered by their P-values. ENZA=Enzalutamide, ADT=Androgen deprivation therapy, XRT=Radiation therapy.

**Supplementary Dataset S2. Differential expression results for different treatment conditions (ENZA+XRT vs. XRT, ADT+XRT vs. XRT, ENZA+ADT+XRT vs. XRT) in C4-2 cell line.** Genes are ordered by their P-values. ENZA=Enzalutamide, ADT=Androgen deprivation therapy, XRT=Radiation therapy.

**Supplementary Dataset S3. Differential expression results for different treatment conditions (ENZA vs. CTR, ADT vs. CTR, ENZA+ADT vs. CTR) in LNCaP cell line.** Genes are ordered by their P-values. ENZA=Enzalutamide, ADT=Androgen deprivation therapy, CTR=Control.

**Supplementary Dataset S4. Differential expression results for different treatment conditions (ENZA vs. CTR, ADT vs. CTR, ENZA+ADT vs. CTR) in C4-2 cell line.** Genes are ordered by their P-values. ENZA=Enzalutamide, ADT=Androgen deprivation therapy, CTR=Control.
